# Supplementary material for: Involvement of mitogen activated protein kinase kinase 6 in UV induced transcripts accumulation of genes in phytoalexin biosynthesis in rice
Source: PubMed Central journal article supplement (PMC4883730; doi:10.1186/1939-8433-6-35), 2013-12-02
Supplement: 12284_2012_67_MOESM1_ESM.pdf [file 12284_2012_67_MOESM1_ESM.pdf]

# Additional file 1

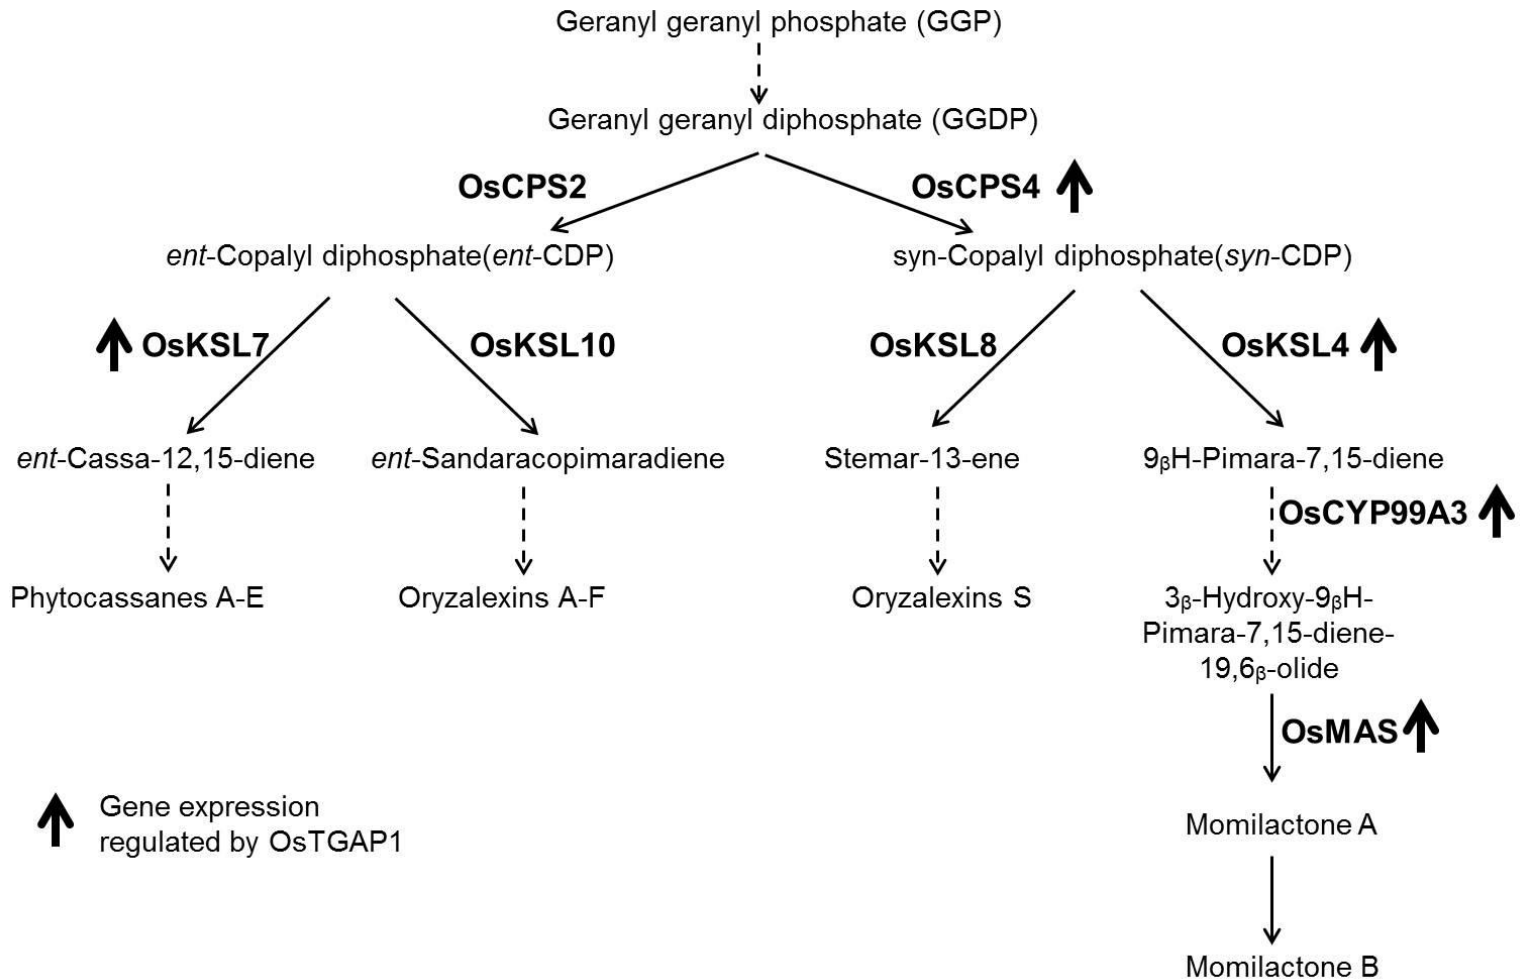

## Supplemental Figure S1

Reference:

Okada A, Okada K, Miyamoto K, Koga J, Shibuya N, Nojiri H, and Yamane H (2009) OsTGAP1, a bZIP transcription factor, coordinately regulates the inductive production of diterpenoid phytoalexins in rice. J Biol Chem 284:26510-18
