# Supplementary material for: Involvement of mitogen activated protein kinase kinase 6 in UV induced transcripts accumulation of genes in phytoalexin biosynthesis in rice
Source: PubMed Central journal article supplement (PMC4883730; doi:10.1186/1939-8433-6-35), 2013-12-02
Supplement: 12284_2012_67_MOESM3_ESM.pdf [file 12284_2012_67_MOESM3_ESM.pdf]

### Additional file 3

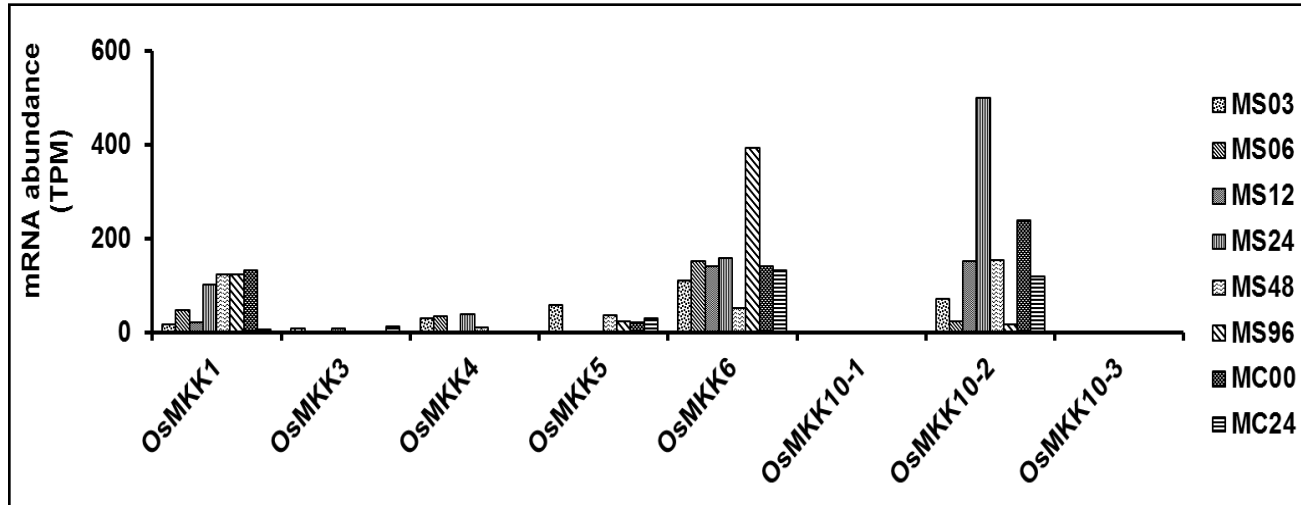

Supplemental Figure S3
